# Supplementary material for: Sequential and ordered assembly of a large DNA repair complex on undamaged chromatin
Source: PubMed Central journal article supplement — J Cell Biol. 2014 Sep 1;206(5):589–98. doi: 10.1083/jcb.201403096 (PMC4151144; doi:10.1083/jcb.201403096), 2014-09-01
Supplement: supp_jcb.201403096_JCB_201403096_sm.pdf [file supp_jcb.201403096_JCB_201403096_sm.pdf]

Ziani et al., <http://www.jcb.org/cgi/content/full/jcb.201403096/DC1>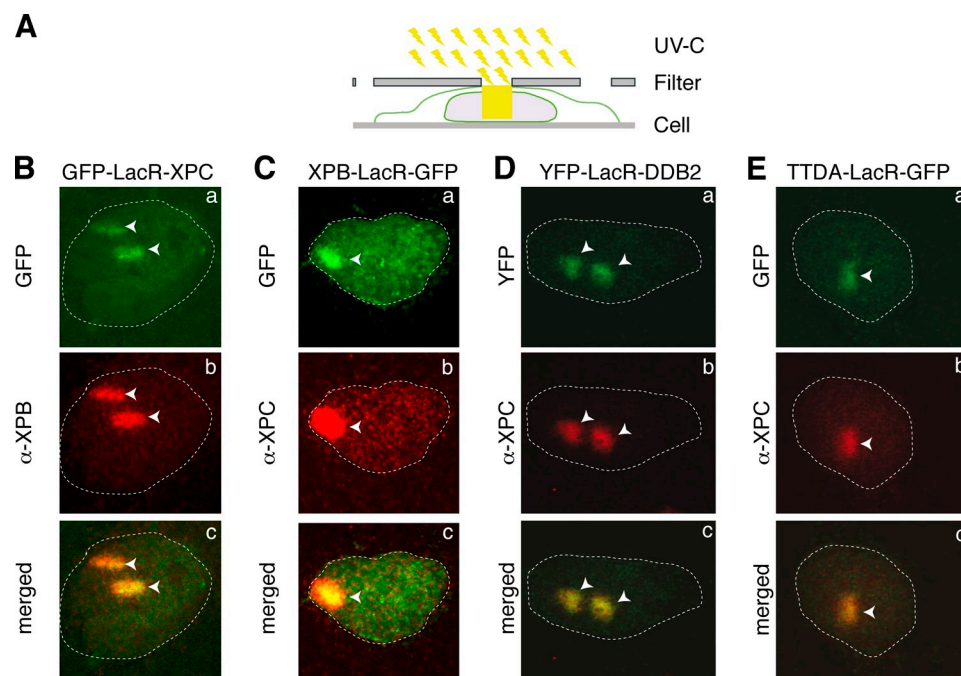

Figure S1. **GFP-LacR fusion constructs get recruited to UV-irradiated regions of the DNA in vivo.** (A) Schematic representation of the local irradiation experiment. Cells are covered with a filter (EMD Millipore) with 5- $\mu$ m pores and UV irradiated to produce local UV DNA damage. (B–E) After transfection of GFP-LacR-XPC<sup>(1–940)</sup> (B), XPB<sup>(1–782)</sup>-LacR-GFP (C), TTDA<sup>(1–71)</sup>-LacR-GFP (E), or YFP-LacR-DDB2<sup>(1–427)</sup> (D), U2OS cells were locally UV irradiated (150 J/m<sup>2</sup>), fixed 15 min later, and stained with an antibody raised against either XPB or XPC (as indicated). Arrowheads indicate locally irradiated areas.

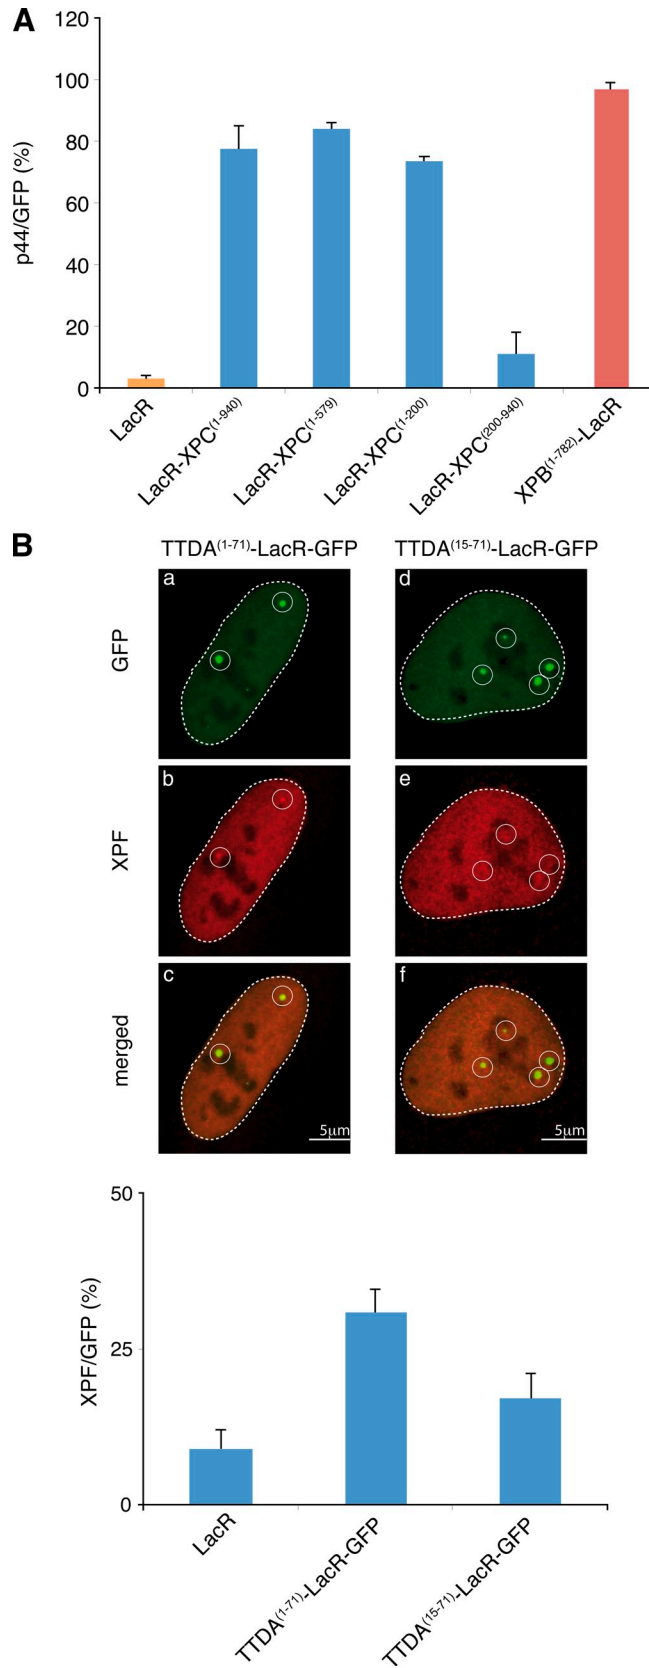

Figure S2. **XPF and p44 localization to the array.** (A) p44 localization frequency to the array in the presence of different tethered GFP-LacR fusion proteins. The values of the graph represent the percentage of colocalization of the TFIIH subunit p44 on the array with the various GFP-LacR fusion constructs as indicated at the bottom of the graph. Values represent the means and SD of three independent experiments. (B) Recruitment of XPF to either tethered  $TTDA^{(1-71)}$ -LacR-GFP or  $TTDA^{(15-71)}$ -LacR-GFP as indicated. The values on the graphs represent the percentage of colocalization of XPF with GFP on the array based on three independent experiments with SD. Circles indicate LacO arrays.

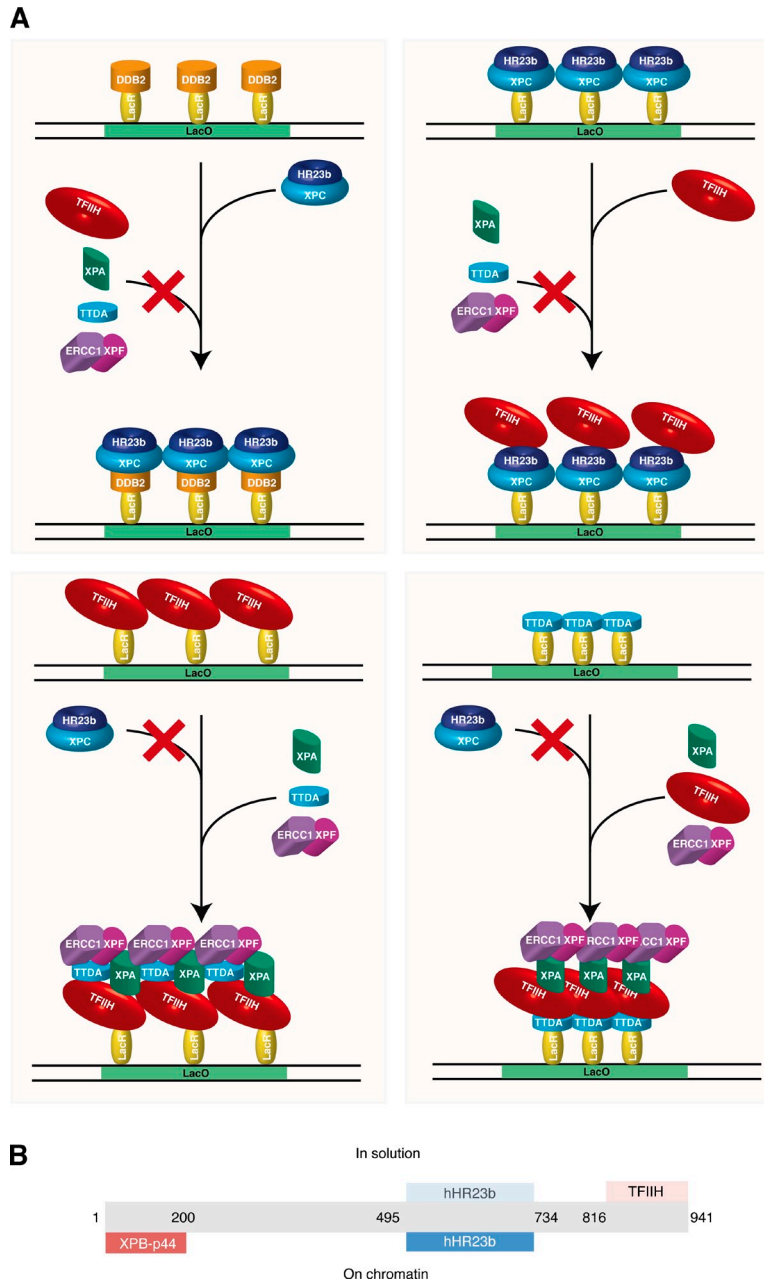

Figure S3. **Model of PinC assembly on undamaged chromatin.** (A) Model for the ordered complex assembly steps achieved by tethering different NER factors to chromatin. (B) Schematic representation of XPC. The interacting domains of XPC with hHR23b and TFIIH in solution (at the top) or on chromatin (at the bottom) are indicated. Positions of amino acids are indicated.

Table S1. **List of antibodies and their dilutions**

| <b>Antibody</b> | <b>References</b>                       | <b>Dilution</b> |
|-----------------|-----------------------------------------|-----------------|
| hHR23B          | Mouse (BD)                              | 1:500           |
| XPC             | 2C11, mouse (homemade IGBMC)            | 1:4,000         |
| XPC             | Rabbit (Bethyl Laboratories, Inc.)      | 1:3,000         |
| XPB             | 1B3, mouse (homemade)                   | 1:4,000         |
| XPB             | Rabbit (Santa Cruz Biotechnology, Inc.) | 1:1,000         |
| XPD             | 2F6, mouse (homemade IGBMC)             | 1:2,000         |
| p44             | 1H5, mouse (homemade IGBMC)             | 1:2,000         |
| p52             | 1D11, mouse (homemade IGBMC)            | 1:2,000         |
| XPA             | Ab-1 IgG2a KAPPA clone 12F5 (GenWay)    | 1:250           |
| HA tag          | Clone 3F10, mouse (Roche)               | 1:300           |
| Flag tag        | Rabbit (Sigma-Aldrich)                  | 1:2,000         |
| p62             | Rabbit (Santa Cruz Biotechnology, Inc.) | 1:2,000         |

IGBMC, Institut de Génétique et de Biologie Moléculaire et Cellulaire.
